1 **Quantifying meaningful adoption of a SARS-CoV-2 exposure notification app on the**  
2 **campus of the University of Arizona**

3 Joanna Masel<sup>1</sup>, Alexandra Shilen<sup>2</sup>, Bruce Helming<sup>3</sup>, Jenna Rutschman<sup>4</sup>, Gary Windham<sup>5</sup>,  
4 Michael Judd<sup>6</sup>, Kristen Pogreba-Brown<sup>2</sup>, Kacey Ernst<sup>2</sup>

5  
6 1. Department of Ecology & Evolutionary Biology, University of Arizona, Tucson, AZ, USA

7  
8 2. Mel and Enid Zuckerman College of Public Health, University of Arizona, Tucson, AZ, USA

9  
10 3. Campus Health, University of Arizona, Tucson, AZ, USA

11  
12 4. College of Science, University of Arizona, Tucson, AZ, USA

13  
14 5. Information Technology, University of Arizona, Tucson, AZ, USA

15  
16 6. Centers for Disease Control and Prevention, Atlanta, GA, USA

17

18 **Abstract**

19 **Objective.** To measure meaningful, local exposure notification adoption without in-app  
20 analytics.

21 **Methods.** We surveyed app usage via case investigation interviews at the University of Arizona,  
22 with a focus on the period from September 9 to November 28, 2020, after automating the  
23 issuance of secure codes to verify positive diagnoses within the test result delivery system. As  
24 independent validation, we compared the number of secure codes issued to the number of local  
25 cases.

26 **Results.** Of cases interviewed by university case investigators, 46% (286/628) reported having  
27 the app, and 55% (157/286) of these app users shared their positive SARS-CoV-2 test result in  
28 the app prior to the case investigation interview, comprising 25% (157/628) of all interviewed  
29 cases. This is corroborated by a 33% (565/1,713) ratio of code issuance (inflated by some  
30 unclaimed codes) to cases. Combining the 25% probability that a primary case rapidly shares  
31 their diagnosis with a 46% probability that the secondary case can receive exposure notifications,  
32 an estimated 11% of transmission pairs exhibit meaningful app usage. We attribute these high  
33 rates, despite the lack of “push” notifications, to a successful marketing campaign that identified  
34 social influencers.

35 **Conclusions.** Usage can be assessed in clusters, without in-app analytics. With marketing, high  
36 uptake in dense social networks like universities make exposure notification a useful  
37 complement to traditional contact tracing. Integrating verification code delivery into patient  
38 results portals was successful in making the exposure notification process rapid.

## 39 **Introduction**

40           Smartphone applications (apps) for exposure notification have the potential, given  
41 sufficient uptake, to significantly reduce the spread of SARS-CoV-2 (1). They do so not by  
42 replacing contact tracing, but by making contact notification faster, more scalable, and  
43 potentially more acceptable due to greater privacy (1). The University of Arizona community  
44 piloted the Covid Watch app, which through the Google/Apple Exposure Notification API  
45 (GAEN), uses Bluetooth to measure date, distance, and duration of contact, and assess infection  
46 risk (2). App users who tested positive for SARS-CoV-2 could anonymously trigger  
47 notifications, including testing and quarantine recommendations, for other Covid Watch users  
48 with whom they had been in close contact while infectious.

49           The focus of this study is to quantify meaningful app uptake. App download numbers are  
50 readily accessible, but overstate active app usage (3). Effective uptake requires not just app  
51 installation in both a primary and a secondary case, but also that the primary case report a  
52 positive SARS-CoV-2 test result by obtaining and entering a secure verification code (either  
53 from their results portal or medical provider). The potential for exposure notification to prevent  
54 SARS-CoV-2 transmission depends not on overall usage in a community, but on usage  
55 specifically among individuals who go on to be infected. One concern is that individuals who  
56 are more likely to download an exposure notification app are generally more compliant with  
57 public health guidelines, and so may be less likely to be infected by SARS-CoV-2, making  
58 population statistics overestimates of effective usage. With the help of a third party, the  
59 University of Arizona used social marketing tools to promote app usage, with a focus on  
60 reaching students via identified influencers (4, 5); here we assess the outcome.

## 61 **Methods**

62 Evaluating GAEN apps is challenging because of their strict privacy protections (6). We  
63 therefore incorporated two questions into case investigation interviews: (i) Have you  
64 downloaded the Covid Watch app?; (ii) If yes, did you already enter the verification code  
65 following your positive test? A portion of the faculty, staff, and students who tested positive  
66 through the on-campus testing program were assigned to a university contact tracing team  
67 (SAFER) by the county health department (7) (the remainder were interviewed by county  
68 investigators and fall outside the scope of the current study). Assignment of cases to the  
69 University of Arizona SAFER team varied over the time period covered in this report due to  
70 changing patterns of incidence. Cases who lived on-campus (dorms and Greek housing) were  
71 consistently assigned to SAFER throughout this time period. For off-campus cases tested  
72 through the University of Arizona testing program, a surge in cases associated with campus  
73 necessitated additional support from county investigators, so from September 10 to October 30,  
74 county health department staff investigated all off-campus cases. Starting October 31 and  
75 continuing on, SAFER investigated all cases tested through the University of Arizona testing  
76 program and anyone who provided an ‘on-campus’ address, even if they were tested off-site. The  
77 team filtered the case data through code developed in R by known on-campus addresses each day  
78 to create these investigation assignments.

79 Upon first launch on August 23, verification codes were given over the phone by Campus  
80 Health. Beginning September 9, end users, when viewing their positive test result in the “Test  
81 All Test Smart” portal that supports the university’s high-volume diagnostic testing, were  
82 prompted to retrieve a code automatically if they had the Covid Watch app. Some individuals  
83 tested positive twice, e.g. once by antigen test and once by PCR. Positive test results, combined  
84 across both Campus Health and the Test All Test Smart program, were de-duplicated to calculate

85 number of cases, by discounting subsequent positive test results for the same individual if they  
86 occurred within a 90 day window from the first positive test.

87 We calculate the fraction of positive tests that lead to a request for a verification code by  
88 dividing number of codes issued by number of cases. We count verification codes at point of  
89 issue rather than upon usage, but because obtaining a code requires action from an infected  
90 individual (either a phone call or clicking on a request link), we expect this to be only a slight  
91 overestimate.

92 Our data span August 23 to November 28 (Fall semester), during which there was a  
93 significant outbreak of SARS-CoV-2 in the student population. Verification code issuance  
94 peaked in the same week as confirmed cases (Figure 1). To evaluate the impact of automated  
95 code delivery, we compare data before versus after September 9.

96 Use of aggregate data collected under public health surveillance guidelines was deemed  
97 not human subjects research by University of Arizona privacy officers in consultation with the  
98 university's IRB.

## 99 **Results**

100 Campus testing programs recorded 2,728 positive tests from August 23 to November 28,  
101 representing 2,360 cases. Of these cases, the University of Arizona team was assigned 1,359  
102 cases to investigate and conduct contact tracing, while the remaining cases were investigated by  
103 the local health department and are not included in our sample. The university contact tracing  
104 team succeeded in reaching and interviewing 64% (876/1359) of their assigned cases, in all cases  
105 including the survey questions. Among these interviewed cases, 35% (302/876) reported no  
106 contacts to case investigators. Results are summarized in Table 1.

107           The proportion of interviewed cases who had downloaded the app improved during the  
108 initial weeks of the launch, rising from 38% (95/248) before September 9 to 46% (286/628) over  
109 the remainder of our reporting period. More strikingly, the proportion of app-using cases that had  
110 entered a positive diagnosis code into their app prior to the case interview, enabling rapid contact  
111 notification, rose from 32/95 (34%) before September 9 to 157/286 (55%) after. This latter  
112 comparison shows how the introduction of automated code distribution improved usage.

113           From September 9 onward, 25% (157/628) of the interviewed cases both had the app and  
114 had entered a positive diagnosis code. However, interviewed cases may generally be more  
115 compliant with public health guidelines than other cases, and thus have higher app use. It is  
116 therefore reassuring that we get a similarly high estimate of 33% for this date range by dividing  
117 the 565 verification codes issued by the 1,713 cases testing positive at our campus testing  
118 facilities (rising from 48/647 (7%) prior to September 9 when codes were issued only by phone).

119           Because cases were asked whether they had entered verification codes prior to case  
120 investigation interviews, our results demonstrate that notification via the Covid Watch app was  
121 more rapid not only than traditional contact tracing at the University of Arizona, but also than  
122 digital exposure notification workflows used elsewhere in which case investigators provide  
123 verification codes over the phone. Our automated code delivery via an end-user test results portal  
124 is now adopted by commercial test providers in Arizona.

## 125 **Public Health Implications**

126           We propose and estimate a metric of meaningful usage among cases. Because the app's  
127 purpose is to quarantine the infected prior to diagnosis, focusing on cases is more  
128 epidemiologically meaningful than usage among the general population. We consider the

129 scenario where a primary case infects a secondary case within a tightly interconnected college  
130 campus, and estimate the probability that both cases have used the app to the minimum necessary  
131 level to potentially impact transmission. From September 9 onward, the estimated probability of  
132 sufficient usage by the primary case is 25% (where verification code entry is required, occurring  
133 at a similar 55% rate as Germany (8)) and 46% for the secondary case (requiring only app  
134 activation). Combining these by assuming a well-mixed population, and neglecting transmission  
135 from outside campus given low community prevalence at the time this pilot study was  
136 conducted, app usage is estimated to affect 11% of transmission pairs (Table 1). In a structured  
137 population where individuals in the same transmission pair have more similar app usage rates,  
138 this value will be higher than 11%.

139 Our app usage metric can be used to estimate the expected reduction in  $R(t)$  due to the  
140 direct impact of exposure notification influencing the quarantine, testing and ultimately isolation  
141 behavior of secondary cases. This reduction could be ~11% if 1) all cases carried their phones  
142 with them at the time transmission occurred, 2) primary cases are tested rapidly, 3) the app  
143 detects exposures that led to transmission, and 4) notifications following infection eliminated  
144 forward disease transmission by sufficiently changing the behavior of secondary cases. The  
145 direct reduction in  $R(t)$  will be smaller, because of violations in these assumptions, especially the  
146 fourth given reports of low quarantine compliance (9, 10). However,  $R(t)$  is also indirectly  
147 reduced when the far larger number of exposure events that do not lead to transmission also lead  
148 to behavior change, which either prevents infection in the notification recipient, or elicits first  
149 quarantine and then isolation after they have been infected by a different exposure within the  
150 same social network (11).

151 To promote end-user adoption, most U.S. States have relied on “push” notifications sent  
152 out by Apple and Google directly to smartphone users’ phones. These were not available at the  
153 time of this study, and are currently available only for Apple’s own Exposure Notification  
154 Express system and not for custom iOS apps (12). Another strategy to promote adoption is to use  
155 the same app to check in to venues as a privacy-preserving alternative to giving personal details  
156 (1); this is unavailable in jurisdictions that do not collect venue attendance for possible contact  
157 tracing purposes. Here we have shown that it is possible to achieve high adoption within a tightly  
158 interconnected community using a social influencer marketing strategy, without the advantage of  
159 push notifications or a multi-purpose app.

160 Here we have proposed a new metric for assessing app usage within a tightly  
161 interconnected community that does its own testing and tracing. Usage on the University of  
162 Arizona campus is high enough to make it a useful tool that complements and augments  
163 traditional contact tracing. Highly interconnected communities such as college campuses, large  
164 workplaces, tribal nations, and congregate living settings could benefit from targeted adoption  
165 campaigns. Further evaluation is needed to assess the extent of compliance with quarantine  
166 among contacts receiving notification via such apps, which is a key determinant of the overall  
167 impact of EN on reducing SARS COV-2 transmission.

## 168 **References**

- 169 1. Wymant C, Ferretti L, Tsallis D, Charalambides M, Abeler-Dörner L, Bonsall D, et al. The  
170 epidemiological impact of the NHS COVID-19 App. 2021;2021(February 9):[https://github.com/BDI-](https://github.com/BDI-pathogens/covid-19_instant_tracing/blob/master/Epidemiological_Impact_of_the_NHS_COVID_19_App_Public_Release_V1.pdf)  
171 [pathogens/covid-](https://github.com/BDI-pathogens/covid-19_instant_tracing/blob/master/Epidemiological_Impact_of_the_NHS_COVID_19_App_Public_Release_V1.pdf)  
172 [19\\_instant\\_tracing/blob/master/Epidemiological\\_Impact\\_of\\_the\\_NHS\\_COVID\\_19\\_App\\_Public\\_Release](https://github.com/BDI-pathogens/covid-19_instant_tracing/blob/master/Epidemiological_Impact_of_the_NHS_COVID_19_App_Public_Release_V1.pdf)  
173 [V1.pdf](https://github.com/BDI-pathogens/covid-19_instant_tracing/blob/master/Epidemiological_Impact_of_the_NHS_COVID_19_App_Public_Release_V1.pdf).  
174 2. Wilson AM, Aviles N, Petrie JI, Beamer PI, Szabo Z, Xie M, et al. Quantifying SARS-CoV-2 infection  
175 risk within the Google/Apple exposure notification framework to inform quarantine recommendations.  
176 Risk Analysis 2021;manuscript accepted.



- 177 3. Federal Statistics Office. SwissCovid App Monitoring. 2021;2021(January 17.  
178 2021):[https://www.experimental.bfs.admin.ch/expstat/en/home/innovative-methods/swisscovid-app-](https://www.experimental.bfs.admin.ch/expstat/en/home/innovative-methods/swisscovid-app-monitoring.html)  
179 [monitoring.html](https://www.experimental.bfs.admin.ch/expstat/en/home/innovative-methods/swisscovid-app-monitoring.html).
- 180 4. Baer J. Just How Powerful Is Influencer Marketing? 2016;2021(Feb  
181 22):[https://www.convinceandconvert.com/convince-and-convert-podcast/how-powerful-is-influencer-](https://www.convinceandconvert.com/convince-and-convert-podcast/how-powerful-is-influencer-marketing/)  
182 [marketing/](https://www.convinceandconvert.com/convince-and-convert-podcast/how-powerful-is-influencer-marketing/).
- 183 5. Schaffer N. The age of influence: the power of influencers to elevate your brand: Harper Collins  
184 Leadership; 2020.
- 185 6. Benzler J, Bogdanov D, Kirchner G, Lueks W, Lucas R, Oliveira R, et al. Towards a common  
186 performance and effectiveness terminology for digital proximity tracing applications. arXiv preprint  
187 2020:arXiv:2012.12927.
- 188 7. Pogreba Brown K, Austhof E, Rosa Hernández AM, McFadden C, Boyd K, Sharma J, et al. Training  
189 and Incorporating Students in SARS-CoV-2 Case Investigations and Contact Tracing. Public Health  
190 Reports 2020;0(0):1-7.
- 191 8. Robert Koch Institut. Kennzahlen zur Corona-Warn-App.  
192 2020:[https://www.rki.de/DE/Content/InfAZ/N/Neuartiges\\_Coronavirus/WarnApp/Archiv\\_Kennzahlen/K](https://www.rki.de/DE/Content/InfAZ/N/Neuartiges_Coronavirus/WarnApp/Archiv_Kennzahlen/Kennzahlen_04122020.pdf?blob=publicationFile)  
193 [ennzahlen\\_04122020.pdf? blob=publicationFile](https://www.rki.de/DE/Content/InfAZ/N/Neuartiges_Coronavirus/WarnApp/Archiv_Kennzahlen/Kennzahlen_04122020.pdf?blob=publicationFile).
- 194 9. Smith LE, Potts HWW, Amlot R, Fear NT, Michie S, Rubin J. Adherence to the test, trace and  
195 isolate system: results from a time series of 21 nationally representative surveys in the UK (the COVID-  
196 19 Rapid Survey of Adherence to Interventions and Responses [CORSAIR] study). medRxiv  
197 2020:2020.09.15.20191957.
- 198 10. Steens A, Freiesleben de Blasio B, Veneti L, Gimma A, Edmunds WJ, Van Zandvoort K, et al. Poor  
199 self-reported adherence to COVID-19-related quarantine/isolation requests, Norway, April to July 2020.  
200 Eurosurveillance 2020;25(37):2001607.
- 201 11. Guttal V, Krishna S, Siddharthan R. Risk assessment via layered mobile contact tracing for  
202 epidemiological intervention. medRxiv 2020:2020.04.26.20080648.
- 203 12. Center NloHFI. Video recording from COVID-19 Exposure Notification Digital Tools Webinar.  
204 2021:[http://www.eebweb.arizona.edu/faculty/masel/Covid19\\_Research/index.html](http://www.eebweb.arizona.edu/faculty/masel/Covid19_Research/index.html).

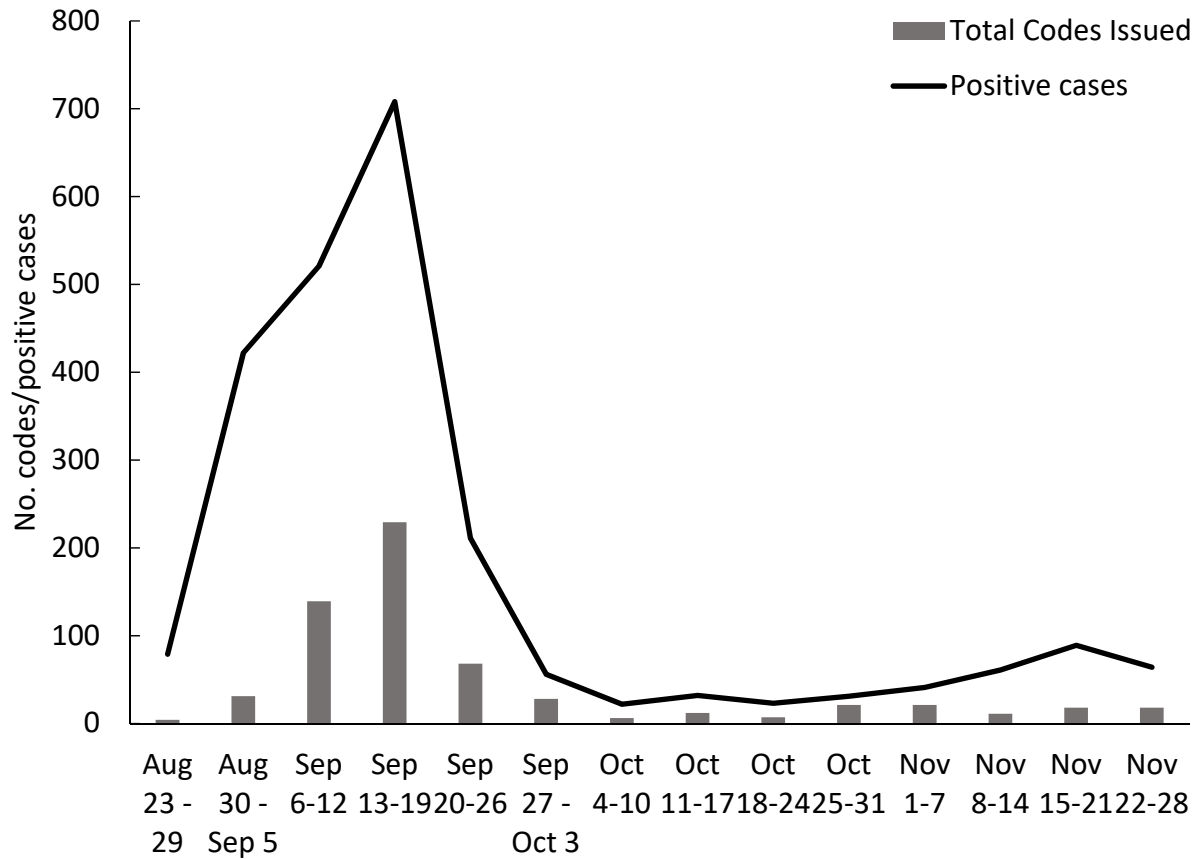

206

207 **Figure 1.** The number of verification codes issued tracks the number of cases during an outbreak  
208 among students on the campus of the University of Arizona. The total number of codes issued  
209 represented only 7% of the number of cases prior to the automation of code delivery on  
210 September 9, and rose to 33% for the remainder of the study period.

211

212

213

| Metric                                                                                                    | Aug 23 - Sep 8 | Sep 9 - Nov 28 | Total |
|-----------------------------------------------------------------------------------------------------------|----------------|----------------|-------|
| Positive Codes issued by phone                                                                            | 48             | 166            | 214   |
| Positive Codes issued via test results portal                                                             | 0              | 399            | 399   |
| Total Positive Codes issued                                                                               | 48             | 565            | 613   |
| Positive tests                                                                                            | 676            | 2052           | 2728  |
| Cases                                                                                                     | 647            | 1,713          | 2,360 |
| Cases investigated by university contact tracing team                                                     |                |                | 1,359 |
| Number of cases reached by university contact tracing team                                                | 248            | 628            | 876   |
| Downloaded the app                                                                                        | 95             | 286            | 381   |
| Entered a code to share their positive test                                                               | 32             | 157            | 189   |
| Downloads/Cases Reached                                                                                   | 38.3%          | <b>45.5%</b>   | 43.5% |
| Code Entries/Cases Reached                                                                                | 12.9%          | <b>25.0%</b>   | 21.6% |
| Codes Issued/Cases                                                                                        | 7.4%           | <b>33.0%</b>   | 26.0% |
| R(t) Adoption metric (primary case and secondary case, product of Downloads/Cases and Code Entries/Cases) | 4.9%           | <b>11.4%</b>   | 9.4%  |

214

215 **Table 1.** The frequency with which cases used the Covid Watch app increased far more  
 216 following the automation of verification code delivery than did the frequency with which cases  
 217 had the app downloaded at the time of case interview. Key numbers following code delivery  
 218 automation are shown in bold.

219
